# Supplementary material for: Daunorubicin and Its Active Metabolite Pharmacokinetic Profiles in Acute Myeloid Leukaemia Patients: A Pharmacokinetic Ancillary Study of the BIG-1 Trial
Source: MDPI journal article supplement (doi:10.3390/pharmaceutics14040792), 2022-04-05
Supplement: s1 [file s1]

# Supplementary Materials: Daunorubicin and Its Active Metabolite Pharmacokinetic Profiles in Acute Myeloid Leukaemia Patients: A Pharmacokinetic Ancillary Study of the BIG-1 Trial

Guillaume Drevin, Marie Briet, Caroline Bazzoli, Emmanuel Gyan, Aline Schmidt, Hervé Dombret, Corentin Orvain, Aurelien Giltat, Christian Recher, Norbert Ifrah, Philippe Guardiola, Mathilde Hunault-Berger and Chadi Abbata

## Supplementary Information

**Table S1.** Within-run and between-run reproducibility results.

| Analyte        | Within-run reproducibility (n=6) |                                |             |      | Between-run reproducibility (n=6) |             |      |
|----------------|----------------------------------|--------------------------------|-------------|------|-----------------------------------|-------------|------|
|                | Nominal concentration (ng/ml)    | Measured concentration (ng/ml) | Accuracy y% | CV % | Measured concentration (ng/ml)    | Accuracy y% | CV % |
| Daunorubicin   | 20                               | 20.6                           | 103         | 5.1  | 18.3                              | 91.6        | 4.0  |
|                | 200                              | 210                            | 105         | 2.7  | 201                               | 101         | 2.6  |
|                | 750                              | 746                            | 99.5        | 1.4  | 769                               | 103         | 3.4  |
| Daunorubicinol | 20                               | 19.5                           | 97.6        | 4.1  | 19.4                              | 97.0        | 4.2  |
|                | 200                              | 206                            | 103         | 2.6  | 203                               | 102         | 3.0  |
|                | 750                              | 742                            | 98.9        | 1.5  | 757                               | 101         | 2.2  |

**Table S2.** Stability study results (n=3).

| Analyte        | Nominal Concentration | At -20°C for 6 months |       | Bench-top for 12 hours |       | Auto-sampler for 12 hours |       |
|----------------|-----------------------|-----------------------|-------|------------------------|-------|---------------------------|-------|
|                |                       | Recovery%             | CV%   | Recovery%              | CV%   | Recovery%                 | CV%   |
| Daunorubicin   | 20                    | 101.33                | 13.40 | 102.67                 | 9.61  | 110.33                    | 3.84  |
|                | 200                   | 96.13                 | 4.26  | 91.07                  | 4.55  | 102.25                    | 10.49 |
|                | 750                   | 96.63                 | 4.60  | 99.80                  | 5.30  | 91.41                     | 5.51  |
| Daunorubicinol | 20                    | 105.56                | 7.29  | 105.67                 | 10.15 | 110.00                    | 4.29  |
|                | 200                   | 97.73                 | 5.50  | 103.53                 | 3.77  | 101.33                    | 5.12  |
|                | 750                   | 104.70                | 4.30  | 105.88                 | 6.02  | 97.2                      | 2.98  |

**Table S3.** Demographics and molecular characteristics of the 14 patients included.

| Patient | Age | Sex | BSA (m <sup>2</sup> ) | Cytogenetic risk group | FAB classification | CEBPA | NPM1 | FLT3-ITD | FLT3-TKD | Blood blast% | Platelet (G/L) | Hb (g/dL) | Bone marrow blast% | WBC count (G/L) | CRP (mg/L) | Plasma creatinine (μmol/L) | PT % | blood lymphocytes count (G/L) |
|---------|-----|-----|-----------------------|------------------------|--------------------|-------|------|----------|----------|--------------|----------------|-----------|--------------------|-----------------|------------|----------------------------|------|-------------------------------|
| 1       | 32  | M   | 2.27                  | Adverse                | M2                 | -     | -    | -        | +        | 27           | 88             | 10.8      | 74                 | 1.9             | 2          | 83                         | 83   | 1.27                          |
| 2       | 57  | F   | 1.58                  | favourable             | Unclassified       | -     | +    | -        | -        | 17           | 60             | 10.2      | 30                 | 9.7             | 10.3       | 56                         | 79   | 2.33                          |
| 3       | 44  | M   | 2.18                  | Adverse                | M2                 | -     | -    | -        | -        | 62.2         | 62.2           | 8.7       | 92                 | 3.04            | 42         | 58                         | 82   | 1.58                          |
| 4       | 59  | F   | 1.33                  | Intermediate           | M5                 | -     | +    | -        | -        | 75           | 34             | 10.3      | 80                 | 118.37          | 30         | 89                         | 53   | 10.65                         |
| 5       | 52  | M   | 1.73                  | Intermediate           | M5                 | -     | +    | +        | -        | 91.9         | 27             | 5.5       | 92                 | 173.64          | 128        | 71                         | 85   | 9.72                          |
| 6       | 44  | M   | 1.8                   | Intermediate           | M2                 | +     | -    | -        | 0-       | 21.5         | 39             | 14.1      | 28                 | 5.31            | 43         | 59                         | 93   | 1.95                          |
| 7       | 49  | M   | 1.86                  | Intermediate           | M5                 | -     | +    | +        | -        | 18.5         | 68             | 8.1       | 72                 | 2.66            | 179        | 64                         | 71   | 1.79                          |
| 8       | 58  | M   | 1.9                   | Intermediate           | M2                 | -     | -    | -        | -        | 0.9          | 79             | 9.4       | 15                 | 0.92            | 21         | 60                         | 84   | 0.34                          |
| 9       | 50  | M   | 2.5                   | Intermediate           | M5                 | -     | +    | -        | -        | 2.5          | 90             | 7         | 81                 | 64.82           | 299        | 68                         | 68   | 3.89                          |
| 10      | 45  | F   | 1.5                   | Intermediate           | M1                 | -     | -    | -        | -        | 16.3         | 30             | 11.7      | 16.3               | 6.04            | 2          | 58                         | 77   | 2.55                          |

|    |    |   |      |              |    |   |   |   |   |      |    |      |    |      |     |     |    |      |
|----|----|---|------|--------------|----|---|---|---|---|------|----|------|----|------|-----|-----|----|------|
| 11 | 34 | F | 1.75 | Intermediate | M2 | - | + | + | - | 66.1 | 75 | 10.8 | 83 | 9.45 | 109 | 57  | 87 | 1.58 |
| 12 | 60 | M | 2.08 | Intermediate | M5 | - | - | - | - | 42.8 | 57 | 9.8  | 91 | 1.85 | 9   | 115 | 85 | 0.99 |
| 13 | 50 | F | 1.86 | Adverse      | M2 | - | - | - | + | 4.6  | 35 | 9.4  | 86 | 1.02 | 16  | 58  | 81 | 0.45 |
| 14 | 43 | M | 2.58 | Adverse      | M2 | - | - | - | - | 1.7  | 29 | 9.7  | 38 | 2.12 | 189 | 85  | 82 | 1.02 |

BSA: body surface area; Hb: haemoglobin; WBC: white blood cell count; CRP: C reactive protein; PT%: prothrombin time %

**Table S4.** Co-medications reported in the 14 studied patients.

| Patient<br>s | Co-medications                                                                                                                                                                          |
|--------------|-----------------------------------------------------------------------------------------------------------------------------------------------------------------------------------------|
| 1            | Ondansetron - Metoclopramide                                                                                                                                                            |
| 2            | Insulin                                                                                                                                                                                 |
| 3            | Allopurinol - Ondansetron - Tramadol - Ceftriaxone - Amikacin                                                                                                                           |
| 4            | Allopurinol - Hydroxyurea - Paracetamol - Oxycodone - Potassium chloride - Oxazepam - Hydroxyzine - Ondansetron - Rasburicase - Furosemide - Ceftriaxone - Levofloxacin                 |
| 5            | Allopurinol - Hydroxyurea - Morphine - Nefopam - Vancomycin - Ceftazidime - Aciclovir - Furosemide - Insulin - Oxycodone - Oxazepam - Magnesium chloride - Ondansetron                  |
| 6            | Allopurinol - Paracetamol - Nefopam - Ondansetron Primperan, Heparin                                                                                                                    |
| 7            | Allopurinol - Hydroxyurea - Cefotaxime - Metoclopramide - Nefopam - Alprazolam - Valaciclovir - Paracetamol, Clarithromycin - Aprepitant - Zophren, Vancomycin - Ceftazidime - Amikacin |
| 8            | Allopurinol - Alprazolam - Posaconazole - Paracetamol - Valaciclovir - Heparin - Ondansetron                                                                                            |
| 9            | Allopurinol, Acupan, Furosemide, Hydrea, Magnesium, Zophren, Ceftriaxone, Ciprofloxacin                                                                                                 |
| 10           | Allopurinol - Bromazepam - Clindamycin - Levofloxacin - Nomegestrol - Paracetamol - Zolpidem - Zophren                                                                                  |
| 11           | Allopurinol - Ondansetron                                                                                                                                                               |

- 
- 12 Posaconazole - Magnesium - Allopurinol - Valaciclovir - Ondansetron
  - 13 Allopurinol – Metoclopramide – Ceftazidime – Morphine - Ondansetron
  - 14 Posaconazole - Valaciclovir - Allopurinol -  
Ondansetron
-

**Table S5.** Non-compartmental analysis results.

| PK parameter                        | Mean (Range)   |                 | Metabolic ratio (Range) |
|-------------------------------------|----------------|-----------------|-------------------------|
|                                     | Daunorubicin   | Daunorubicinol  |                         |
| AUC <sub>0–last</sub><br>(hr.ng/ml) | 577 (375–1167) | 2200 (933–4683) | 0.32 (0.1–0.44)         |

**Table S6.** Optimal design for models without a covariate effect for the joint model of daunorubicin and its metabolite daunorubicinol.

|                      | Number of elementary designs | Sampling times for each compound (hours) |                      | Number of subjects | Total number of samples |
|----------------------|------------------------------|------------------------------------------|----------------------|--------------------|-------------------------|
|                      |                              | Daunorubicin                             | Daunorubicinol       |                    |                         |
| D <sub>opt</sub>     | 5                            | 0.5, 0.75, 1, 5, 18                      | 0.5, 0.75, 1, 5, 18  | 4                  | 200                     |
|                      |                              | 0.5, 1, 5, 12, 24                        | 0.5, 1, 5, 12, 24    | 3                  |                         |
|                      |                              | 0.5, 0.75, 1, 10, 24                     | 0.5, 0.75, 1, 10, 24 | 7                  |                         |
|                      |                              | 0.5, 0.75, 1, 5, 24                      | 0.5, 0.75, 1, 5, 24  | 5                  |                         |
|                      |                              | 0.5, 0.75, 4, 10, 24                     | 0.5, 0.75, 4, 10, 24 | 1                  |                         |
| D <sub>opt one</sub> | 1                            | 0.5, 0.75, 2, 9, 24                      | 0.5, 0.75, 2, 9, 24  | 20                 | 200                     |

D<sub>opt</sub>: optimal design, D<sub>opt one</sub>: best one group design

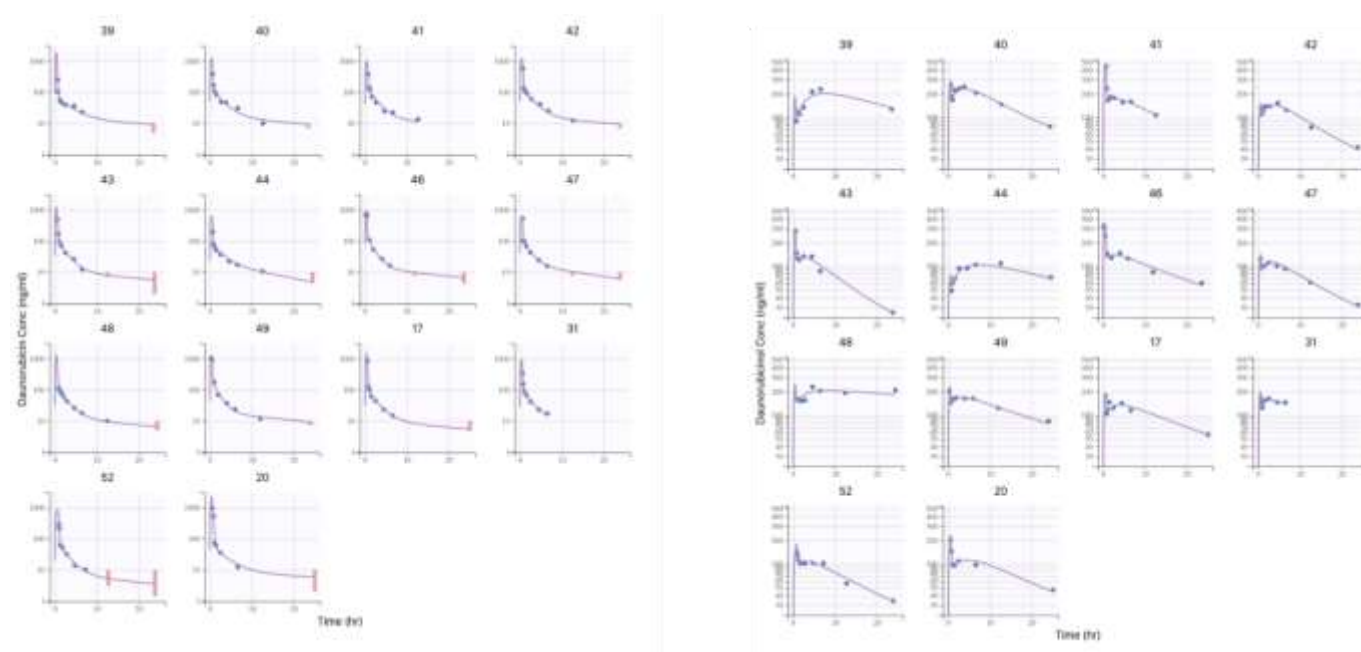**Figure S1.** Predicted individual profiles fitted by means of the estimated individual final model for (A) daunorubicin and (B) daunorubicinol.

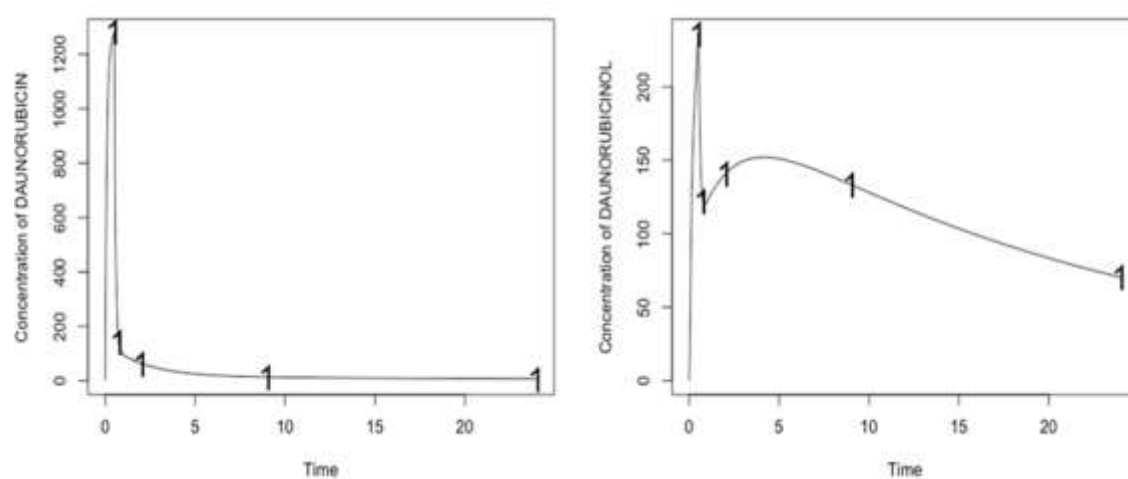

**Figure S2.** Concentration of Daunorubicin and Daunorubicinol versus Time for the population parameter values used in the joint parent-metabolite model. PK sampling times for  $D_{opt}$  for each compound are displayed using the number of values (i.e., 1 for one elementary design).
